# Supplementary material
Source: PubMed Central journal article supplement (PMC4814318)
Supplement: NIHMS734149-supplement-supplemental_material.pdf [file NIHMS734149-supplement-supplemental_material.pdf]

## SUPPLEMENTAL MATERIAL

Supplementary Figure 1. Timeline assessment of physical activity in the Cardiovascular Health Study from 1989/90 to 1998/99.

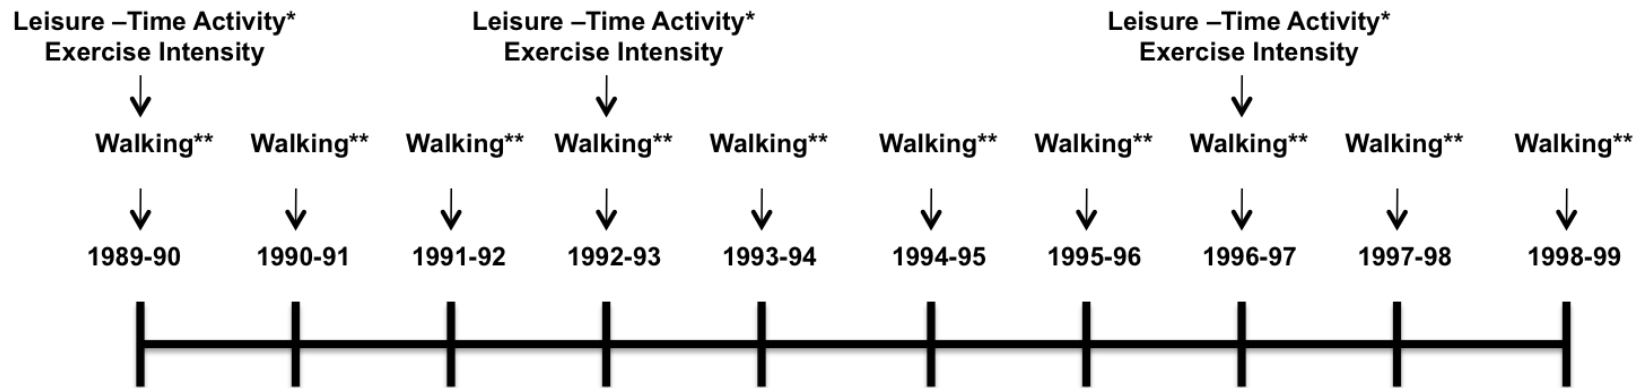

\*\*Both distance and pace walking were assessed.

The 5,888 study participants were recruited from four U.S. communities and have undergone extensive clinic examinations for evaluation of markers of subclinical cardiovascular disease. The original cohort totaled 5,201 participants. A new cohort was recruited in 1992. The 687 participants in the new cohort are predominately African-American and were recruited at three of the four field centers.

Walking score is an ordinal score based on the combination of walking distance and walking pace. Exercise intensity was based on self-reported intensity of exercise, separately evaluated from kcal/week of leisure-time activity and walking.

Supplementary Table 1. Incidence of ischemic and hemorrhagic stroke according to different types of physical activity among 4,207 older US adults\*.

| Hazard ratios (95% confidence intervals) for Stroke |                  |          |                    |          |
|-----------------------------------------------------|------------------|----------|--------------------|----------|
|                                                     | Ischemic Stroke  |          | Hemorrhagic stroke |          |
| <i>N</i> <sup>o</sup> of incidence/total            |                  | <i>p</i> |                    | <i>p</i> |
| Walking pace, mph                                   |                  |          |                    |          |
| < 2                                                 | Reference        |          | Reference          |          |
| 2-3                                                 | 0.63(0.51,0.77)  | <0.001   | 1.29(0.76, 2.21)   | 0.348    |
| > 3                                                 | 0.47(0.33,0.68)  | <0.001   | 0.40(0.13, 1.22)   | 0.106    |
| <i>P trend</i>                                      | <0.001           |          | 0.392              |          |
| Walking distance, blocks/week                       |                  |          |                    |          |
| 0-5                                                 | Reference        |          | Reference          |          |
| 6-12                                                | 0.58(0.44,0.77)  | <0.001   | 0.85(0.40,1.78)    | 0.660    |
| 13-25                                               | 0.52(0.39,0.68)  | <0.001   | 0.74(0.34,1.58)    | 0.435    |
| 26-48                                               | 0.44(0.32,0.60)  | <0.001   | 0.93(0.43,1.99)    | 0.846    |
| ≥49                                                 | 0.45(0.33,0.61)  | <0.001   | 0.68(0.30,1.56)    | 0.363    |
| <i>P trend</i>                                      | <0.001           |          | 0.489              |          |
| Walking Score †                                     |                  |          |                    |          |
| I                                                   | Reference        |          | Reference          |          |
| II                                                  | 0.57(0.44,0.73)  | <0.001   | 0.91(0.45,1.84)    | 0.791    |
| III                                                 | 0.42(0.32,0.56)  | <0.001   | 0.81(0.39,1.68)    | 0.570    |
| IV                                                  | 0.39(0.28,0.54)  | <0.001   | 0.63(0.27,1.50)    | 0.295    |
| <i>P trend</i>                                      | <0.001           |          | 0.272              |          |
| Leisure-time activity, kcal/week †                  |                  |          |                    |          |
| I                                                   | Reference        |          | Reference          |          |
| II                                                  | 0.84(0.64,1.11)  | 0.228    | 0.55(0.26,1.17)    | 0.119    |
| III                                                 | 0.61(0.45,0.82)  | 0.001    | 0.79(0.40,1.57)    | 0.505    |
| IV                                                  | 0.72(0.54,0.97)  | 0.032    | 0.63(0.30,1.32)    | 0.223    |
| V                                                   | 0.58(0.42,0.80)  | 0.001    | 0.52(0.23,1.17)    | 0.114    |
| <i>P trend</i>                                      | 0.001            |          | 0.216              |          |
| Exercise Intensity †                                |                  |          |                    |          |
| None                                                | Reference        |          | Reference          |          |
| Low                                                 | 0.74(0.52,1.05)  | 0.095    | 0.59(0.24,1.41)    | 0.236    |
| Moderate                                            | 0.62(0.43, 0.90) | 0.012    | 0.51(0.20,1.27)    | 0.149    |
| High                                                | 0.39(0.22,0.69)  | 0.001    | 0.65(0.20,2.10)    | 0.474    |
| <i>P trend</i>                                      | 0.001            |          | 0.445              |          |

\* For each analysis participants with prevalent disease at baseline were excluded. All analyses are adjusted for age (years), gender (male/female), race (white/nonwhite), education (< high school, high school, > high school), income (≤/ > \$ 25,000/yr), clinical sites (four categories), smoking (never, former, current), body mass index (kg/m<sup>2</sup>). All physical activity variables were updated over time.

† See text and Supplementary Figure 1 for details on how the physical activity variables were define.

Supplementary Table 2. Incidence of ischemic stroke according to different types of physical activity among older US adults, stratified by age and gender \*.

| Hazard ratios (95% confidence intervals) for Ischemic Stroke |                         |          |                         |          |                 |          |                 |          |  |
|--------------------------------------------------------------|-------------------------|----------|-------------------------|----------|-----------------|----------|-----------------|----------|--|
| <i>N</i> <sup>o</sup> of incidence/total                     | 272/2926                |          | 192/1281                |          | 180/1633        |          | 284/2574        |          |  |
|                                                              | <75 years<br>(69.4±2.6) | <i>p</i> | ≥75 years<br>(79.3±3.9) | <i>p</i> | Men             | <i>p</i> | Women           | <i>p</i> |  |
| Walking pace, mph                                            |                         |          |                         |          |                 |          |                 |          |  |
| < 2                                                          | Reference               |          | Reference               |          | Reference       |          | Reference       |          |  |
| 2-3                                                          | 0.68(0.52,0.90)         | 0.006    | 0.58(0.42,0.79)         | 0.001    | 0.62(0.45,0.87) | 0.005    | 0.65(0.50,0.84) | 0.001    |  |
| > 3                                                          | 0.50(0.33,0.77)         | 0.002    | 0.37(0.17,0.82)         | 0.014    | 0.48(0.28,0.82) | 0.008    | 0.46(0.28,0.75) | 0.002    |  |
| <i>P trend</i>                                               | 0.001                   |          | <0.001                  |          | 0.002           |          | <0.001          |          |  |
| Walking distance, blocks/week                                |                         |          |                         |          |                 |          |                 |          |  |
| 0-5                                                          | Reference               |          | Reference               |          | Reference       |          | Reference       |          |  |
| 6-12                                                         | 0.60(0.40,0.91)         | 0.015    | 0.60(0.40,0.89)         | 0.010    | 0.38(0.22,0.64) | <0.001   | 0.67(0.48,0.94) | 0.019    |  |
| 13-25                                                        | 0.52(0.35,0.78)         | 0.001    | 0.53(0.35,0.81)         | 0.003    | 0.39(0.24,0.62) | <0.001   | 0.57(0.40,0.81) | 0.002    |  |
| 26-48                                                        | 0.48(0.32,0.72)         | <0.001   | 0.41(0.24,0.68)         | 0.001    | 0.31(0.19,0.51) | <0.001   | 0.51(0.34,0.77) | 0.001    |  |
| ≥49                                                          | 0.52(0.35,0.79)         | 0.002    | 0.32(0.17,0.58)         | <0.001   | 0.28(0.17,0.45) | <0.001   | 0.62(0.41,0.94) | 0.025    |  |
| <i>P trend</i>                                               | 0.005                   |          | <0.001                  |          | <0.001          |          | 0.003           |          |  |
| Walking Score †                                              |                         |          |                         |          |                 |          |                 |          |  |
| I                                                            | Reference               |          | Reference               |          | Reference       |          | Reference       |          |  |
| II                                                           | 0.62(0.43,0.91)         | 0.013    | 0.56(0.39,0.80)         | 0.001    | 0.43(0.27,0.68) | <0.001   | 0.64(0.47,0.86) | 0.004    |  |
| III                                                          | 0.43(0.29,0.63)         | <0.001   | 0.45(0.30,0.68)         | <0.001   | 0.33(0.21,0.52) | <0.001   | 0.46(0.33,0.66) | <0.001   |  |
| IV                                                           | 0.47(0.31,0.71)         | <0.001   | 0.20(0.10,0.42)         | <0.001   | 0.25(0.15,0.42) | <0.001   | 0.52(0.34,0.79) | 0.002    |  |
| <i>P trend</i>                                               | <0.001                  |          | <0.001                  |          | <0.001          |          | <0.001          |          |  |
| Leisure-time activity, kcal/week †                           |                         |          |                         |          |                 |          |                 |          |  |
| I                                                            | Reference               |          | Reference               |          | Reference       |          | Reference       |          |  |
| II                                                           | 1.10(0.74,1.64)         | 0.637    | 0.66(0.44,0.99)         | 0.044    | 0.70(0.40,1.25) | 0.228    | 0.89(0.65,1.23) | 0.479    |  |
| III                                                          | 0.68(0.44,1.06)         | 0.089    | 0.60(0.40,0.90)         | 0.015    | 0.59(0.34,1.02) | 0.058    | 0.60(0.42,0.87) | 0.006    |  |
| IV                                                           | 1.04(0.69,1.56)         | 0.856    | 0.46(0.28,0.74)         | 0.001    | 0.63(0.37,1.07) | 0.087    | 0.77(0.54,1.11) | 0.162    |  |
| V                                                            | 0.76(0.49,1.18)         | 0.229    | 0.42(0.25,0.72)         | 0.001    | 0.53(0.32,0.90) | 0.018    | 0.57(0.36,0.91) | 0.019    |  |
| <i>P trend</i>                                               | 0.219                   |          | <0.001                  |          | 0.037           |          | 0.008           |          |  |
| Exercise Intensity †                                         |                         |          |                         |          |                 |          |                 |          |  |
| None                                                         | Reference               |          | Reference               |          | Reference       |          | Reference       |          |  |
| Low                                                          | 0.61(0.40,1.00)         | 0.050    | 0.90(0.55,1.48)         | 0.671    | 0.87(0.43,1.75) | 0.694    | 0.71(0.47,1.07) | 0.103    |  |
| Moderate                                                     | 0.56(0.34,0.93)         | 0.026    | 0.65(0.38,1.11)         | 0.116    | 0.83(0.41,1.67) | 0.604    | 0.55(0.35,0.85) | 0.007    |  |
| High                                                         | 0.39(0.20,0.77)         | 0.006    | 0.20(0.05,0.88)         | 0.033    | 0.53(0.21,1.33) | 0.179    | 0.34(0.16,0.72) | 0.005    |  |
| <i>P trend</i>                                               | 0.018                   |          | 0.005                   |          | 0.210           |          | 0.001           |          |  |

\* For each analysis participants with prevalent disease at baseline were excluded. All analyses are adjusted for age (years), gender (male/female), race (white/nonwhite), education (< high school, high school, > high school), income (≤/ > \$ 25,000/yr), clinical sites (four categories), smoking (never, former, current), body mass index (kg/m<sup>2</sup>). All physical activity variables were updated over time.

† See text and Supplementary Figure 1 for details on how the physical activity variables were define.

Supplementary Table 3. Incidence of CHD, stroke and CVD according to different types of physical activity among older US adults, adjusting for blood pressure, blood lipid levels, and C-reactive protein.\*

|                                          | Hazard ratios (95% confidence intervals) |          |                  |          |                 |          |
|------------------------------------------|------------------------------------------|----------|------------------|----------|-----------------|----------|
|                                          | Total CHD                                |          | Total Stroke     |          | Total CVD       |          |
| <i>N</i> <sup>o</sup> of incidence/total | 680/3815                                 |          | 513/3815         |          | 1069/3815       |          |
|                                          |                                          | <i>p</i> |                  | <i>p</i> |                 | <i>p</i> |
| Walking-pace, mph                        |                                          |          |                  |          |                 |          |
| < 2                                      | Reference                                |          | Reference        |          | Reference       |          |
| 2-3                                      | 0.69(0.59,0.82)                          | <0.001   | 0.69(0.57,0.84)  | <0.001   | 0.69(0.60,0.79) | <0.001   |
| > 3                                      | 0.55(0.41,0.74)                          | <0.001   | 0.47(0.33,0.67)  | <0.001   | 0.52(0.41,0.65) | <0.001   |
| <i>P</i> -trend                          | <0.001                                   |          | <0.001           |          | <0.001          |          |
| Walking-distance, blocks/week            |                                          |          |                  |          |                 |          |
| 0-5                                      | Reference                                |          | Reference        |          | Reference       |          |
| 6-12                                     | 0.87(0.68,1.11)                          | 0.253    | 0.57(0.44,0.75)  | <0.001   | 0.71(0.58,0.85) | <0.001   |
| 13-25                                    | 0.90(0.71,1.15)                          | 0.416    | 0.53(0.40,0.69)  | <0.001   | 0.71(0.59,0.86) | <0.001   |
| 26-48                                    | 0.64(0.49,0.84)                          | 0.001    | 0.53(0.40,0.70)  | <0.001   | 0.58(0.47,0.71) | <0.001   |
| ≥49                                      | 0.71(0.54,0.93)                          | 0.013    | 0.49(0.36,0.66)  | <0.001   | 0.57(0.46,0.70) | <0.001   |
| <i>P</i> -trend                          | 0.002                                    |          | <0.001           |          | <0.001          |          |
| Walking-Score †                          |                                          |          |                  |          |                 |          |
| I                                        | Reference                                |          | Reference        |          | Reference       |          |
| II                                       | 0.99(0.79,1.26)                          | 0.984    | 0.57(0.45,0.73)  | <0.001   | 0.77(0.64,0.92) | 0.004    |
| III                                      | 0.72(0.56,0.92)                          | 0.010    | 0.47(0.36,0.61)  | <0.001   | 0.57(0.47,0.69) | <0.001   |
| IV                                       | 0.65(0.49,0.87)                          | 0.003    | 0.43(0.31,0.58)  | <0.001   | 0.50(0.40,0.62) | <0.001   |
| <i>P</i> -trend                          | <0.001                                   |          | <0.001           |          | <0.001          |          |
| Leisure-time activity, kcal/week †       |                                          |          |                  |          |                 |          |
| I                                        | Reference                                |          | Reference        |          | Reference       |          |
| II                                       | 0.60(0.47,0.77)                          | <0.001   | 0.77(0.59,1.00)  | 0.048    | 0.68(0.56,0.82) | <0.001   |
| III                                      | 0.66(0.52,0.84)                          | 0.001    | 0.58(0.44,0.77)  | <0.001   | 0.64(0.53,0.77) | <0.001   |
| IV                                       | 0.69(0.54,0.88)                          | 0.002    | 0.71(0.54,0.93)  | 0.013    | 0.71(0.58,0.86) | <0.001   |
| V                                        | 0.56(0.43,0.73)                          | <0.001   | 0.53(0.39, 0.72) | <0.001   | 0.56(0.47,0.70) | <0.001   |
| <i>P</i> -trend                          | 0.001                                    |          | <0.001           |          | <0.001          |          |
| Exercise Intensity †                     |                                          |          |                  |          |                 |          |
| None                                     | Reference                                |          | Reference        |          | Reference       |          |
| Low                                      | 0.56(0.43,0.74)                          | <0.001   | 0.68(0.48,0.96)  | 0.028    | 0.63(0.49,0.79) | <0.001   |
| Moderate                                 | 0.53(0.40,0.70)                          | <0.001   | 0.55(0.38,0.78)  | 0.001    | 0.55(0.43,0.70) | <0.001   |
| High                                     | 0.45(0.30,0.68)                          | <0.001   | 0.41(0.25,0.69)  | 0.001    | 0.44(0.31,0.62) | <0.001   |
| <i>P</i> -trend                          | 0.001                                    |          | <0.001           |          | <0.001          |          |

CVD cardiovascular disease; CHD, coronary heart disease. \*Sample size included fewer participants in each analysis due to missing data on blood pressure, blood lipid levels, and C-reactive protein. For each analysis participants with prevalent disease at baseline were excluded. All analyses are adjusted for age (years), gender (male/female), race (white/nonwhite), education (< high school, high school, > high school), income (≤/ > \$ 25,000/yr), clinical sites (four categories), smoking (never, former, current), body mass index (kg/m<sup>2</sup>). All physical activity variables were updated over time.

† See text and Supplementary Figure 1 for details on how the physical activity variables were defined.

Supplementary Table 4. Incidence of CHD, stroke and CVD according to different types of physical activity among older US adults, excluding participants with poor or fair self-reported health status at baseline\*.

|                                          | Hazard ratios (95% confidence intervals) |          |                  |          |                 |          |
|------------------------------------------|------------------------------------------|----------|------------------|----------|-----------------|----------|
|                                          | Total CHD                                |          | Total Stroke     |          | Total CVD       |          |
| <i>N</i> <sup>o</sup> of incidence/total | 578/3376                                 | <i>p</i> | 435/3376         | <i>p</i> | 911/3376        | <i>p</i> |
| Walking-pace, mph                        |                                          |          |                  |          |                 |          |
| < 2                                      | Reference                                |          | Reference        |          | Reference       |          |
| 2-3                                      | 0.63(0.53,0.76)                          | <0.001   | 0.68(0.55,0.84)  | <0.001   | 0.64(0.56,0.75) | <0.001   |
| > 3                                      | 0.47(0.35,0.64)                          | <0.001   | 0.46(0.32,0.66)  | <0.001   | 0.47(0.37,0.60) | <0.001   |
| <i>P</i> -trend                          | <0.001                                   |          | <0.001           |          | <0.001          |          |
| Walking-distance, blocks/week            |                                          |          |                  |          |                 |          |
| 0-5                                      | Reference                                |          | Reference        |          | Reference       |          |
| 6-12                                     | 0.82(0.62,1.08)                          | 0.163    | 0.57(0.42,0.78)  | <0.001   | 0.69(0.55,0.85) | 0.001    |
| 13-25                                    | 0.83(0.63,1.09)                          | 0.172    | 0.57(0.42,0.77)  | <0.001   | 0.68(0.55,0.84) | <0.001   |
| 26-48                                    | 0.61(0.45,0.82)                          | 0.001    | 0.50(0.36,0.69)  | <0.001   | 0.55(0.44,0.70) | <0.001   |
| ≥49                                      | 0.64(0.47,0.86)                          | 0.003    | 0.48(0.34,0.66)  | <0.001   | 0.53(0.42,0.67) | <0.001   |
| <i>P</i> -trend                          | 0.001                                    |          | <0.001           |          | <0.001          |          |
| Walking-Score †                          |                                          |          |                  |          |                 |          |
| I                                        | Reference                                |          | Reference        |          | Reference       |          |
| II                                       | 0.92(0.71,1.21)                          | 0.560    | 0.61(0.46,0.81)  | 0.001    | 0.76(0.62,0.93) | 0.008    |
| III                                      | 0.67(0.51,0.88)                          | 0.005    | 0.48(0.36,0.65)  | <0.001   | 0.56(0.45,0.69) | <0.001   |
| IV                                       | 0.55(0.40,0.75)                          | <0.001   | 0.42(0.30,0.59)  | <0.001   | 0.45(0.35,0.58) | <0.001   |
| <i>P</i> -trend                          | <0.001                                   |          | <0.001           |          | <0.001          |          |
| Leisure-time activity, kcal/week †       |                                          |          |                  |          |                 |          |
| I                                        | Reference                                |          | Reference        |          | Reference       |          |
| II                                       | 0.65(0.49,0.87)                          | 0.002    | 0.87(0.64,1.17)  | 0.353    | 0.73(0.59,0.91) | 0.004    |
| III                                      | 0.67(0.51,0.87)                          | 0.003    | 0.64(0.47,0.88)  | 0.005    | 0.66(0.54,0.82) | <0.001   |
| IV                                       | 0.66(0.50,0.86)                          | 0.003    | 0.72(0.53,0.99)  | 0.041    | 0.70(0.56,0.86) | 0.001    |
| V                                        | 0.53(0.40,0.70)                          | <0.001   | 0.57(0.41, 0.80) | 0.001    | 0.56(0.45,0.71) | <0.001   |
| <i>P</i> -trend                          | <0.001                                   |          | 0.001            |          | <0.001          |          |
| Exercise Intensity †                     |                                          |          |                  |          |                 |          |
| None                                     | Reference                                |          | Reference        |          | Reference       |          |
| Low                                      | 0.64(0.46,0.89)                          | 0.007    | 0.69(0.46,1.02)  | 0.062    | 0.68(0.52,0.89) | 0.005    |
| Moderate                                 | 0.62(0.45,0.87)                          | 0.005    | 0.62(0.42, 0.93) | 0.021    | 0.63(0.48,0.83) | 0.001    |
| High                                     | 0.56(0.36,0.87)                          | 0.009    | 0.44(0.25,0.76)  | 0.003    | 0.52(0.36,0.75) | <0.001   |
| <i>P</i> -trend                          | 0.048                                    |          | 0.006            |          | 0.002           |          |

CVD cardiovascular disease; CHD, coronary heart disease. \* Sample size included 454 fewer participants in each analysis due to missing data on self-reported health status. For each analysis participants with prevalent disease at baseline were excluded. All analyses are adjusted for age (years), gender (male/female), race (white/nonwhite), education (< high school, high school, > high school), income (≤/ > \$ 25,000/yr), clinical sites (four categories), smoking (never, former, current), body mass index (kg/m<sup>2</sup>). All physical activity variables were updated over time.

† See text and Supplementary Figure 1 for details on how the physical activity variables were defined.

Supplementary Table 5. Incidence of cardiovascular disease according to different types of physical activity among older US adults, stratified by health status\*.

| Hazard ratios (95% confidence intervals) for Cardiovascular Heart Disease |                 |                 |                 |                 |                               |
|---------------------------------------------------------------------------|-----------------|-----------------|-----------------|-----------------|-------------------------------|
| <i>N</i> <sup>o</sup> of incidence/total                                  | 149/643         | 256/1051        | 436/1369        | 194/578         | 29/69                         |
|                                                                           | Excellent       | Very good       | Good            | Fair            | Poor                          |
| Walking pace, mph                                                         |                 |                 |                 |                 |                               |
| < 2                                                                       | Reference       | Reference       | Reference       | Reference       | Reference                     |
| 2-3                                                                       | 0.73(0.48,1.12) | 0.75(0.56,1.00) | 0.59(0.48,0.72) | 0.98(0.72,1.33) | 1.03(0.29,3.64)               |
| > 3                                                                       | 0.57(0.33,0.97) | 0.61(0.39,0.95) | 0.41(0.27,0.63) | 1.34(0.69,2.63) | 1.58 x10 <sup>-15</sup> (0,.) |
| <i>P</i> trend                                                            | 0.04            | 0.02            | <0.001          | 0.727           | 0.986                         |
| Walking distance, blocks/week                                             |                 |                 |                 |                 |                               |
| 0-5                                                                       | Reference       | Reference       | Reference       | Reference       | Reference                     |
| 6-12                                                                      | 0.62(0.29,1.29) | 0.78(0.50,1.22) | 0.60(0.45,0.82) | 0.86(0.57,1.30) | 0.42(0.06,2.81)               |
| 13-25                                                                     | 0.84(0.45,1.57) | 0.81(0.52,1.25) | 0.65(0.48,0.87) | 0.73(0.47,1.11) | 9.13(1.92,43.37)              |
| 26-48                                                                     | 0.85(0.45,1.60) | 0.68(0.43,1.09) | 0.46(0.33,0.64) | 0.75(0.46,1.22) | 3.01(0.20,46.5)               |
| ≥49                                                                       | 0.55(0.29,1.05) | 0.61(0.38,0.99) | 0.53(0.39,0.74) | 0.79(0.47,1.34) | 27.4(2.37,318.1)              |
| <i>P</i> trend                                                            | 0.135           | 0.045           | <0.001          | 0.220           | 0.013                         |
| Walking Score †                                                           |                 |                 |                 |                 |                               |
| I                                                                         | Reference       | Reference       | Reference       | Reference       | Reference                     |
| II                                                                        | 1.12(0.54,2.32) | 0.83(0.54,1.28) | 0.69(0.53,0.92) | 0.86(0.59,1.25) | 0.88(0.23,3.33)               |
| III                                                                       | 0.95(0.47,1.92) | 0.68(0.44,1.07) | 0.47(0.35,0.64) | 0.65(0.42,1.02) | 4.09(0.80,20.8)               |
| IV                                                                        | 0.60(0.28,1.28) | 0.58(0.35,0.96) | 0.45(0.32,0.63) | 0.98(0.57,1.67) | 5.21(0.37,72.9)               |
| <i>P</i> trend                                                            | 0.023           | 0.017           | <0.001          | 0.362           | 0.115                         |
| Leisure-time activity, kcal/week †                                        |                 |                 |                 |                 |                               |
| I                                                                         | Reference       | Reference       | Reference       | Reference       | Reference                     |
| II                                                                        | 1.33(0.70,2.51) | 0.40(0.26,0.61) | 0.84(0.62,1.14) | 0.81(0.53,1.25) | 0.44(0.09,2.10)               |
| III                                                                       | 0.84(0.44,1.63) | 0.62(0.43,0.91) | 0.69(0.51,0.94) | 0.74(0.47,1.16) | 0.66(0.11,3.97)               |
| IV                                                                        | 1.04(0.56,1.92) | 0.46(0.31,0.69) | 0.80(0.58,1.10) | 1.03(0.65,1.63) | 1.58(0.34,7.36)               |
| V                                                                         | 0.73(0.38,1.39) | 0.39(0.25,0.61) | 0.67(0.48,0.93) | 0.86(0.51,1.43) | 5.37(1.26,22.85)              |
| <i>P</i> trend                                                            | 0.121           | <0.001          | 0.026           | 0.904           | 0.084                         |
| Exercise Intensity †                                                      |                 |                 |                 |                 |                               |
| None                                                                      | Reference       | Reference       | Reference       | Reference       | Reference                     |
| Low                                                                       | 1.44(0.45,4.65) | 0.43(0.26,0.72) | 0.68(0.47,0.97) | 0.69(0.43,1.11) | 0.57(0.43,1.11)               |
| Moderate                                                                  | 1.54(0.48,4.93) | 0.40(0.24,0.67) | 0.65(0.44,0.94) | 0.55(0.33,0.91) | 1.92(0.33,0.91)               |
| High                                                                      | 1.15(0.33,4.00) | 0.25(0.12,0.54) | 0.66(0.40,1.08) | 0.94(0.35,2.54) | 3.46 x10 <sup>-16</sup> (0,.) |
| <i>P</i> trend                                                            | 0.879           | 0.005           | 0.136           | 0.069           | 0.473                         |

\* For each analysis participants with prevalent disease at baseline were excluded. All analyses are adjusted for age (years), gender (male/female), race (white/nonwhite), education (< high school, high school, > high school), income (≤/ > \$ 25,000/yr), clinical sites (four categories), smoking (never, former, current), body mass index (kg/m<sup>2</sup>). All physical activity variables were updated over time.



† See text and Supplementary Figure 1 for details on how the physical activity variables were define.

Supplementary Table 6. Incidence of CHD, stroke and CVD according to mutual adjusted analyses to different types of physical activity PA among 4,207 older US adults \*.

|                                  | Hazard ratios (95% confidence intervals) |          |                  |          |                 |          |
|----------------------------------|------------------------------------------|----------|------------------|----------|-----------------|----------|
|                                  | Total CHD                                |          | Total Stroke     |          | Total CVD       |          |
| <i>N° of incidence/total</i>     | 762/4207                                 | <i>p</i> | 464/4207         | <i>p</i> | 1182/4207       | <i>p</i> |
| Walking Score †                  | 0.83(0.76,0.91)                          | <0.001   | 0.74(0.72,0.87)  | <0.001   | 0.79(0.73,0.85) | <0.001   |
| Leisure-time activity, kcal/week | 0.98(0.92,1.06)                          | 0.660    | 1.00 (0.92,1.09) | 0.996    | 1.00(0.94,1.06) | 0.939    |
| Exercise intensity ‡             | 0.89(0.79,1.00)                          | 0.059    | 0.86(0.73,1.00)  | 0.054    | 0.88(0.80,0.97) | 0.008    |

Mutually-adjusted analyses for walking score, leisure-time activity and exercise intensity. CVD cardiovascular disease; CHD, coronary heart disease. \* For each analysis participants with prevalent disease at baseline were excluded. All analyses are adjusted for age (years), gender (male/female), race (white/nonwhite), education (< high school, high school, > high school), income ( $\leq$ / $>$  \$ 25,000/yr), clinical sites (four categories), smoking (never, former, current), body mass index ( $\text{kg}/\text{m}^2$ ). All physical activity variables were updated over time.

† See text and Supplementary Figure 1 for details on how the physical activity variables were defined.
